# Supplementary material for: Polarizability of C60 fullerene dimer and oligomers: the unexpected enhancement and its use for rational design of fullerene-based nanostructures with adjustable properties
Source: Royal Society of Chemistry journal article supplement (doi:10.1039/c3ra42498g), 2013-01-01
Supplement: c3ra42498g2.pdf [file c3ra42498g2.pdf]

## Supplementary Information

### to the article

#### **Polarizability of C<sub>60</sub> fullerene dimer and oligomers: The unexpected enhancement and its use for rational design of fullerene-based nanostructures with adjustable properties**

*Denis Sh. Sabirov*

General description

**Section A.** Accuracy of PBE/3 $\zeta$  method applied to C<sub>60</sub>, C<sub>70</sub> and (C<sub>60</sub>)<sub>2</sub>.

**Section B.** Mean polarizability and its exaltation for (C<sub>20</sub>)<sub>n</sub> ( $n = 1-4$ ) calculated by PBE/3 $\zeta$  and RI-PBE0/Λ1 methods.

**Section C.** Diagonalized tensors of polarizability calculated by PBE/3 $\zeta$  method.

**Section D.** SI to the article includes also the optimized geometries of all the compounds studied in the work, several output files with Hessians (C<sub>60</sub>, (C<sub>60</sub>)<sub>2</sub>, C<sub>60</sub>C<sub>60</sub>F<sub>16</sub>, [C<sub>60</sub>(CH<sub>2</sub>)<sub>5</sub>]<sub>2</sub>, trans 3-(C<sub>60</sub>)<sub>3</sub>, trans 2-(C<sub>60</sub>)<sub>3</sub>, cyclic (C<sub>60</sub>)<sub>3</sub>). Note, Hessian calculations output files also contain non-diagonalized tensors of polarizability. All polarizability values are in a.u. (1 a.u. = 0.148 Å<sup>3</sup>).

Output files can be open by ChemCraft or QCC Front-End programs.

## Section A. Accuracy of PBE/3 $\zeta$ method applied to C<sub>60</sub>, C<sub>70</sub> and (C<sub>60</sub>)<sub>2</sub>

1. The comparison between the calculated and experimental parameters for C<sub>60</sub> and C<sub>70</sub>

| Parameters                                                              | C <sub>60</sub> |                   | C <sub>70</sub> |                   |
|-------------------------------------------------------------------------|-----------------|-------------------|-----------------|-------------------|
|                                                                         | PBE/3z          | Experimental data | PBE/3z          | Experimental data |
| Bond lengths (Å) <sup>†</sup>                                           | 5.6 bonds       |                   | <i>aa</i> bond  |                   |
|                                                                         | 1.453           | 1.458             | 1.452           | 1.453–1.463       |
|                                                                         | 6.6 bonds       |                   | <i>ab</i> bond  |                   |
|                                                                         | 1.399           | 1.401             | 1.400           | 1.381–1.388       |
|                                                                         |                 |                   | <i>bc</i> bond  |                   |
|                                                                         |                 |                   | 1.449           | 1.449–1.453       |
|                                                                         |                 |                   | <i>cc</i> bond  |                   |
|                                                                         |                 |                   | 1.394           | 1.376–1.441       |
|                                                                         |                 |                   | <i>cd</i> bond  |                   |
|                                                                         |                 |                   | 1.446           | 1.432–1.468       |
|                                                                         |                 |                   | <i>dd</i> bond  |                   |
|                                                                         |                 |                   | 1.439           | 1.425–1.438       |
|                                                                         |                 |                   | <i>de</i> bond  |                   |
|                                                                         |                 |                   | 1.422           | 1.405–1.423       |
|                                                                         |                 | <i>ee</i> bond    |                 |                   |
|                                                                         |                 | 1.469             | 1.462–1.538     |                   |
| IR spectra (cm <sup>-1</sup> ) <sup>‡</sup>                             | 526             | 527               | 457             | 457               |
|                                                                         | 576             | 576               | 529             | 533               |
|                                                                         | 1179            | 1183              | 565             | 563               |
|                                                                         | 1432            | 1429              | 574             | 572               |
|                                                                         |                 |                   | 642             | 643               |
|                                                                         |                 |                   | 674             | 670               |
|                                                                         |                 |                   | 793             | 745               |
|                                                                         |                 |                   | 1131            | 1130              |
|                                                                         |                 | 1414              | 1406            |                   |
|                                                                         |                 | 1430              | 1430            |                   |
|                                                                         |                 | 1460              | 1463            |                   |
| Entropy $S_f^\circ$ (J K <sup>-1</sup> mol <sup>-1</sup> ) <sup>§</sup> | 549.1           | 544.0 (gas)       | 636.0           | 614.0 (gas)       |

<sup>†</sup> Experimentally determined bond lengths: for C<sub>60</sub> – V. I. Sokolov, I. V. Stankevich, Russ. Chem. Rev. 62 (1993), 419; for C<sub>70</sub> – V. V. Zverev, V. I. Kovalenko, Russ. J. Phys. Chem. A 80 (2001) 99.

<sup>‡</sup> IR spectra of C<sub>60</sub> and C<sub>70</sub> are from V. I. Sokolov, I. V. Stankevich, Russ. Chem. Rev. 62 (1993), 419.

<sup>§</sup> Experimental entropies for gas phase have been taken from Standard thermodynamic properties of chemical substances, CRC PRESS LLC, 2000.

2 Comparison between the calculated and experimental parameters for  $(C_{60})_2$

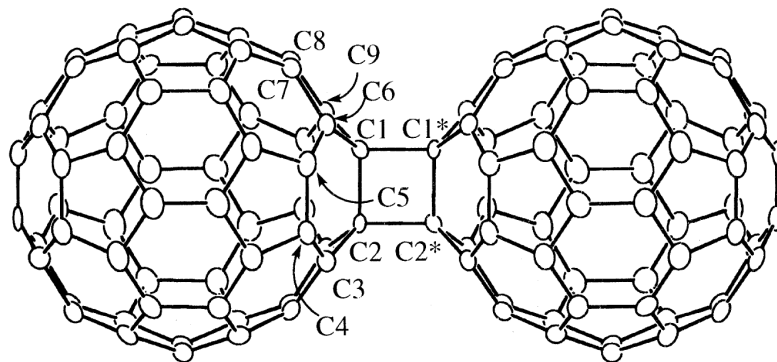

Structural data of  $(C_{60})_2$

| Parameter | X-ray    | PBE/3 $\zeta$ |
|-----------|----------|---------------|
| L(C1-C1*) | 1,575(7) | 1,598         |
| L(C1-C2)  | 1,581(7) | 1,599         |
| L(C2-C3)  | 1,530(8) | 1,522         |
| L(C3-C4)  | 1,374(7) | 1,383         |
| L(C4-C5)  | 1,468(8) | 1,48          |
| L(C5-C6)  | 1,358(9) | 1,383         |
| L(C6-C1)  | 1,528(7) | 1,522         |
| L(C6-C7)  | 1,445(8) | 1,438         |
| L(C7-C8)  | 1,457(9) | 1,452         |
| C2-C1-C6  | 115,4(5) | 115,24        |
| C2-C1-C9  | 115,2(4) | 115,24        |
| C6-C1-C9  | 100,7(4) | 101,189       |
| C2-C1-C1* | 90,3(4)  | 89,997        |
| C1-C2-C2* | 89,7(4)  | 90,002        |

X-ray structure is taken from Ref. 2

IR spectrum ( $cm^{-1}$ )

| Experiment | PBE/3 $\zeta$ |
|------------|---------------|
| 1464       | 1467          |
| 1425       | 1433          |
| 1188       | 1187          |
| 770        | 802           |
| 762        | 778           |
| 746        | 716           |
| 710        | 710           |
| 612        | 609           |
| 574        | 574           |
| 560        | 564           |
| 551        | 551           |
| 548        | 544           |
| 527        | 526           |
| 480        | 476           |
| 449        | 446           |
| 419        | 440           |

Measured IR spectrum is taken from Ref. 1.

**Section B. Mean polarizability and its exaltation for  $(C_{20})_n$  ( $n = 1-4$ ) calculated by PBE/3 $\zeta$  and RI-PBE0/ $\Lambda$ 1 methods**

| Molecule     | PBE/3 $\zeta$ |                       | RI-PBE0/ $\Lambda$ 1 |                       |
|--------------|---------------|-----------------------|----------------------|-----------------------|
|              | $\alpha$      | $\Delta\alpha^{(I)*}$ | $\alpha$             | $\Delta\alpha^{(I)*}$ |
| $C_{20}$     | 27.78         | –                     | 22.45                | –                     |
| $(C_{20})_2$ | 58.59         | 3.03                  | 47.90                | 3.00                  |
| $(C_{20})_3$ | 92.88         | 9.54                  | 78.25                | 10.90                 |
| $(C_{20})_4$ | 129.13        | 18.01                 | 105.77               | 15.97                 |

\* The exaltation was calculated analogously to Equations 4 and 6:

$$\alpha_{add}^{(I)}((C_{20})_n) = n\alpha_{C_{20}}$$

$$\Delta\alpha^{(I)} = \alpha_{DFT} - \alpha_{add}^{(I)}$$

## Section C. Diagonalized tensors of polarizability calculated by PBE/3 $\zeta$ method

### (C<sub>60</sub>)<sub>n</sub> and related molecules

| Molecule                                                        | $\alpha_{xx}, \text{\AA}^3$ | $\alpha_{yy}, \text{\AA}^3$ | $\alpha_{zz}, \text{\AA}^3$ | $\alpha, \text{\AA}^3$ |
|-----------------------------------------------------------------|-----------------------------|-----------------------------|-----------------------------|------------------------|
| C <sub>60</sub>                                                 | 82.7                        | 82.7                        | 82.7                        | 82.7                   |
| (C <sub>60</sub> ) <sub>2</sub>                                 | 150.2                       | 151.3                       | 238.4                       | 180.0                  |
| e-(C <sub>60</sub> ) <sub>3</sub>                               | 326.7                       | 287.4                       | 215.1                       | 276.4                  |
| trans 2-(C <sub>60</sub> ) <sub>3</sub>                         | 218.1                       | 231.5                       | 405.5                       | 285.1                  |
| trans 3-(C <sub>60</sub> ) <sub>3</sub>                         | 216.4                       | 253.9                       | 376.2                       | 282.1                  |
| trans 4-(C <sub>60</sub> ) <sub>3</sub>                         | 355.9                       | 265.7                       | 217.0                       | 279.6                  |
| Cyclic (C <sub>60</sub> ) <sub>3</sub>                          | 206.8                       | 317.5                       | 318.8                       | 281.1                  |
| Linear (C <sub>60</sub> ) <sub>4</sub>                          | 624.0                       | 285.6                       | 282.6                       | 397.4                  |
| Cyclic (C <sub>60</sub> ) <sub>4</sub>                          | 431.3                       | 429.6                       | 268.5                       | 376.4                  |
| T-shaped (C <sub>60</sub> ) <sub>4</sub>                        | 499.7                       | 372.8                       | 278.4                       | 383.6                  |
| Linear (C <sub>60</sub> ) <sub>5</sub>                          | 831.1                       | 352.5                       | 348.5                       | 510.7                  |
| "+"-shaped (C <sub>60</sub> ) <sub>5</sub>                      | 551.3                       | 550.4                       | 338.6                       | 480.1                  |
| C <sub>60</sub> C <sub>60</sub> F <sub>16</sub>                 | 150.1                       | 158.3                       | 240.4                       | 183.0                  |
| [C <sub>60</sub> (CH <sub>2</sub> ) <sub>5</sub> ] <sub>2</sub> | 172.9                       | 172.9                       | 252.6                       | 199.5                  |

### C<sub>60</sub> and its derivatives used for calculations in terms of additive scheme (I)

| Molecule                                        | $\alpha_{xx}, \text{\AA}^3$ | $\alpha_{yy}, \text{\AA}^3$ | $\alpha_{zz}, \text{\AA}^3$ | $\alpha, \text{\AA}^3$ |
|-------------------------------------------------|-----------------------------|-----------------------------|-----------------------------|------------------------|
| C <sub>60</sub>                                 | 82.7                        | 82.7                        | 82.7                        | 82.7                   |
| C <sub>60</sub> F <sub>16</sub>                 | 71.9                        | 95.2                        | 95.2                        | 87.4                   |
| C <sub>60</sub> (CH <sub>2</sub> ) <sub>5</sub> | 88.7                        | 95.5                        | 95.7                        | 93.3                   |

### Bowl-shaped hydrocarbons

| Molecule                        | $\alpha_{xx}, \text{\AA}^3$ | $\alpha_{yy}, \text{\AA}^3$ | $\alpha_{zz}, \text{\AA}^3$ | $\alpha, \text{\AA}^3$ |
|---------------------------------|-----------------------------|-----------------------------|-----------------------------|------------------------|
| C <sub>21</sub> H <sub>12</sub> | 19.7                        | 44.1                        | 44.1                        | 36.0                   |
| C <sub>30</sub> H <sub>12</sub> | 31.5                        | 69.0                        | 69.4                        | 56.6                   |
| C <sub>36</sub> H <sub>12</sub> | 42.3                        | 72.6                        | 72.7                        | 62.5                   |
| C <sub>42</sub> H <sub>18</sub> | 110.0                       | 110.1                       | 49.70                       | 90.0                   |
| C <sub>50</sub> H <sub>10</sub> | 74.4                        | 81.3                        | 81.4                        | 79.0                   |

### Dimers of bowl-shaped hydrocarbons

| Molecule                                        | $\alpha_{xx}, \text{\AA}^3$ | $\alpha_{yy}, \text{\AA}^3$ | $\alpha_{zz}, \text{\AA}^3$ | $\alpha, \text{\AA}^3$ |
|-------------------------------------------------|-----------------------------|-----------------------------|-----------------------------|------------------------|
| (C <sub>21</sub> H <sub>12</sub> ) <sub>2</sub> | 63.1                        | 67.4                        | 75.8                        | 68.8                   |
| (C <sub>30</sub> H <sub>12</sub> ) <sub>2</sub> | 81.9                        | 123.5                       | 135.0                       | 113.3                  |
| (C <sub>36</sub> H <sub>12</sub> ) <sub>2</sub> | 103.7                       | 130.3                       | 151.6                       | 128.5                  |
| (C <sub>42</sub> H <sub>18</sub> ) <sub>2</sub> | 136.1                       | 202.4                       | 209.0                       | 182.5                  |
| (C <sub>50</sub> H <sub>10</sub> ) <sub>2</sub> | 144.7                       | 147.3                       | 218.1                       | 170.0                  |

**[2+2] hydrocarbon—fullerene cycloadducts**

| Molecule             | $\alpha_{xx}, \text{Å}^3$ | $\alpha_{yy}, \text{Å}^3$ | $\alpha_{zz}, \text{Å}^3$ | $\alpha, \text{Å}^3$ |
|----------------------|---------------------------|---------------------------|---------------------------|----------------------|
| $C_{60}C_{21}H_{12}$ | 107.3                     | 113.9                     | 145.0                     | 122.1                |
| $C_{60}C_{30}H_{12}$ | 126.8                     | 137.4                     | 172.9                     | 145.7                |
| $C_{60}C_{36}H_{12}$ | 133.3                     | 140.8                     | 187.3                     | 153.8                |
| $C_{60}C_{42}H_{18}$ | 159.3                     | 177.5                     | 209.0                     | 182.0                |
| $C_{60}C_{50}H_{10}$ | 148.1                     | 148.7                     | 228.4                     | 175.1                |
